# Supplementary material
Source: publisher site journal article supplement (https://www.spandidos-publications.com/2973/downloadSupplementary)
Supplement: Supplementary file 2 [file downloadSupplementary]

## Sheet: Sheet1
The enriched GO terms and signaling pathways of Modules from the PPI network of shared DEGs between CVSMCs and COs
Category	Term	Count	%	P-value	﹣Log(pvalue)	Genes	List Total	Pop Hits	Pop Total	Fold Enrichment	Bonferroni	Benjamini	FDR
KEGG_PATHWAY	hsa00350: Tyrosine metabolism	4	50	2.38863e-06	5.62185	MAOA, ALDH1A3, AOX1, ADH1A	7	35	6879	112.31	6.9268e-05	6.9268e-05	0.00201681
KEGG_PATHWAY	hsa00982: Drug metabolism - cytochrome P450	4	50	1.80927e-05	4.7425	MAOA, ALDH1A3, AOX1, ADH1A	7	68	6879	57.8067	0.000524557	0.000262313	0.0152755
GOTERM_MF_DIRECT	GO:0016491: oxidoreductase activity	3	37.5	0.00282043	2.54968	MAOA, ALDH1A3, AOX1	8	200	16881	31.6519	0.101769	0.101769	2.52022
GOTERM_CC_DIRECT	GO:0005829: cytosol	6	75	0.00300708	2.52186	TSC22D3, ALDH1A3, AOX1, ADH1A, ZBTB16, DDIT4	8	3315	18224	4.12308	0.0499088	0.0499088	2.15696
REACTOME_PATHWAY	R-HSA-5365859: RA biosynthesis pathway	2	25	0.0144615	1.83979	ALDH1A3, ADH1A	7	22	9075	117.857	0.16038	0.16038	8.94625
GOTERM_BP_DIRECT	GO:0072593: reactive oxygen species metabolic process	2	25	0.0145019	1.83857	AOX1, DDIT4	8	35	16792	119.943	0.675291	0.675291	14.2835
KEGG_PATHWAY	hsa00360: Phenylalanine metabolism	2	25	0.0147418	1.83145	MAOA, ALDH1A3	7	17	6879	115.613	0.349942	0.133735	11.7854
KEGG_PATHWAY	hsa00340: Histidine metabolism	2	25	0.0190429	1.72027	MAOA, ALDH1A3	7	22	6879	89.3377	0.427402	0.130114	14.9847
GOTERM_BP_DIRECT	GO:0055114: oxidation-reduction process	3	37.5	0.0231624	1.63522	MAOA, ALDH1A3, AOX1	8	592	16792	10.6368	0.83544	0.594341	21.9056
KEGG_PATHWAY	hsa00380: Tryptophan metabolism	2	25	0.0343979	1.46347	MAOA, AOX1	7	40	6879	49.1357	0.637633	0.183738	25.5877
KEGG_PATHWAY	hsa00830:Retinol metabolism	2	25	0.0545591	1.26313	AOX1, ADH1A	7	64	6879	30.7098	0.803484	0.237512	37.7312
KEGG_PATHWAY	hsa00010:Glycolysis / Gluconeogenesis	2	25	0.0570544	1.24371	ALDH1A3, ADH1A	7	67	6879	29.3348	0.817983	0.216026	39.1053
KEGG_PATHWAY	hsa00980:Metabolism of xenobiotics by cytochrome P450	2	25	0.0628554	1.20166	ALDH1A3, ADH1A	7	74	6879	26.5598	0.847808	0.209687	42.1969
KEGG_PATHWAY	hsa05204:Chemical carcinogenesis	2	25	0.067804	1.16874	ALDH1A3, ADH1A	7	80	6879	24.5679	0.86947	0.202473	44.724
KEGG_PATHWAY	hsa01100:Metabolic pathways	4	50	0.0728145	1.13778	MAOA, ALDH1A3, AOX1, ADH1A	7	1219	6879	3.22466	0.888357	0.196875	47.183
